# Supplementary material for: Artificial intelligence performance in detecting tumor metastasis from medical radiology imaging: A systematic review and meta-analysis
Source: PubMed Central journal article supplement — eClinicalMedicine. 2020 Dec 25;31:100669. doi: 10.1016/j.eclinm.2020.100669 (PMC7773591; doi:10.1016/j.eclinm.2020.100669), 2020-12-25
Supplement: mmc1.pdf [file mmc1.pdf]

## Section 1: Search terms and search strategy

a) PubMed

Query: ((deep learning) OR (neural network)) OR (artificial intelligence) OR (machine learning)) AND ((cancer) OR (tumor)) AND (metastasis)

b) Web of Science

#3 AND #2 AND #1

*Indexes=SCI-EXPANDED, SSCI, A&HCI, CPCI-S, CPCI-SSH, BKCI-S, BKCI-SSH, ESCI, CCR-EXPANDED, IC*

*Timespan=1997 to 2020*

1. TS = (“deep learning” OR “neural network” OR “artificial intelligence” OR “machine learning”)

*Indexes=SCI-EXPANDED, SSCI, A&HCI, CPCI-S, CPCI-SSH, BKCI-S, BKCI-SSH, ESCI, CCR-EXPANDED, IC*

*Timespan=1997 to 2020*

2. TS = (“cancer” OR “tumor”)

*Indexes=SCI-EXPANDED, SSCI, A&HCI, CPCI-S, CPCI-SSH, BKCI-S, BKCI-SSH, ESCI, CCR-EXPANDED, IC*

*Timespan=1997 to 2020*

3. TS = metastasis

*Indexes=SCI-EXPANDED, SSCI, A&HCI, CPCI-S, CPCI-SSH, BKCI-S, BKCI-SSH, ESCI, CCR-EXPANDED, IC*

*Timespan=1997 to 2020*

**Section 2: Contingency tables included in the meta-analysis (123 tables from 34 studies)**

| Study                    | Year | Type of metastasis | Primary tumor | Image type | External validation | Algorithm | Total number | TP | FP | FN | TN | Sensitivity | Specificity | AUROC |
|--------------------------|------|--------------------|---------------|------------|---------------------|-----------|--------------|----|----|----|----|-------------|-------------|-------|
| Li-Qiang Zhou            | 2020 | LNM                | Breast cancer | US         | NO                  | DL        | 97           | 40 | 10 | 9  | 38 | 0.82        | 0.79        | 0.9   |
| Li-Qiang Zhou            | 2020 | LNM                | Breast cancer | US         | NO                  | DL        | 97           | 39 | 7  | 10 | 41 | 0.8         | 0.85        | 0.89  |
| Li-Qiang Zhou            | 2020 | LNM                | Breast cancer | US         | NO                  | DL        | 97           | 38 | 10 | 11 | 38 | 0.78        | 0.79        | 0.87  |
| Li-Qiang Zhou            | 2020 | LNM                | Breast cancer | US         | YES                 | DL        | 81           | 37 | 10 | 6  | 28 | 0.85        | 0.73        | 0.89  |
| Li-Qiang Zhou            | 2020 | LNM                | Breast cancer | US         | YES                 | DL        | 81           | 34 | 9  | 9  | 29 | 0.78        | 0.75        | 0.88  |
| Li-Qiang Zhou            | 2020 | LNM                | Breast cancer | US         | YES                 | DL        | 81           | 31 | 10 | 12 | 28 | 0.73        | 0.73        | 0.86  |
| Bettina Baessler         | 2019 | LNM                | Others        | CT         | NO                  | ML        | 23           | 14 | 0  | 1  | 8  | 0.93        | 1           |       |
| Bettina Baessler         | 2019 | LNM                | Others        | CT         | NO                  | ML        | 61           | 22 | 10 | 3  | 26 | 0.88        | 0.76        |       |
| Xiaojun Yang             | 2019 | LNM                | Breast cancer | CT         | NO                  | DL        | 164          | 52 | 42 | 11 | 59 | 0.825       | 0.584       | 0.817 |
| David Coronado0Gutierrez | 2019 | LNM                | Breast cancer | US         | NO                  | DL        | 118          | 45 | 8  | 8  | 57 | 0.849       | 0.877       | 0.937 |
| David Coronado0Gutierrez | 2019 | LNM                | Breast cancer | US         | NO                  | DL        | 77           | 47 | 4  | 6  | 20 | 0.887       | 0.833       | 0.919 |
| Jeong Hoon Lee           | 2019 | LNM                | HNC           | CT         | NO                  | DL        | 104          | 47 | 5  | 5  | 47 | 0.904       | 0.904       | 0.953 |
| Jeong Hoon Lee           | 2019 | LNM                | HNC           | CT         | NO                  | DL        | 104          | 46 | 5  | 6  | 47 | 0.885       | 0.904       | 0.952 |
| Jeong Hoon Lee           | 2019 | LNM                | HNC           | CT         | NO                  | DL        | 104          | 36 | 1  | 16 | 51 | 0.692       | 0.973       | 0.943 |
| Jeong Hoon Lee           | 2019 | LNM                | HNC           | CT         | NO                  | DL        | 104          | 45 | 4  | 7  | 48 | 0.865       | 0.918       | 0.942 |
| Jeong Hoon Lee           | 2019 | LNM                | HNC           | CT         | NO                  | DL        | 104          | 36 | 4  | 16 | 48 | 0.692       | 0.923       | 0.936 |
| Jeong Hoon Lee           | 2019 | LNM                | HNC           | CT         | NO                  | DL        | 104          | 42 | 1  | 10 | 51 | 0.808       | 0.977       | 0.92  |
| Jeong Hoon Lee           | 2019 | LNM                | HNC           | CT         | NO                  | DL        | 104          | 44 | 3  | 8  | 49 | 0.846       | 0.936       | 0.918 |
| Jeong Hoon Lee           | 2019 | LNM                | HNC           | CT         | NO                  | DL        | 104          | 45 | 9  | 7  | 43 | 0.865       | 0.833       | 0.909 |
| Chuangming Li            | 2019 | LNM                | Breast cancer | MRI        | NO                  | ML        | 13           | 5  | 0  | 2  | 6  | 0.71        | 1           | 0.83  |

|                |      |     |               |        |    |    |     |     |    |    |     |        |        |        |
|----------------|------|-----|---------------|--------|----|----|-----|-----|----|----|-----|--------|--------|--------|
| Chuangming Li  | 2019 | LNM | Breast cancer | MRI    | NO | ML | 13  | 6   | 1  | 1  | 5   | 0.86   | 0.83   | 0.83   |
| Chuangming Li  | 2019 | LNM | Breast cancer | MRI    | NO | ML | 13  | 5   | 1  | 2  | 5   | 0.71   | 0.83   | 0.88   |
| Yige Peng      | 2019 | DM  | Others        | PET-CT | NO | DL | 48  | 22  | 5  | 2  | 19  | 0.92   | 0.7917 | 0.8542 |
| Qiuxia Feng MD | 2019 | LNM | Others        | CT     | NO | ML | 490 | 203 | 67 | 76 | 144 | 0.726  | 0.681  | 0.764  |
| Samir D. Mehta | 2019 | DM  | NR            | Others | NO | ML | 200 | 35  | 0  | 10 | 155 | 0.78   | 1      | 0.889  |
| Samir D. Mehta | 2019 | DM  | NR            | Others | NO | ML | 200 | 15  | 5  | 30 | 150 | 0.33   | 0.97   | 0.651  |
| Yoshiko Arijji | 2019 | LNM | HNC           | CT     | NO | DL | 441 | 96  | 60 | 31 | 254 | 0.754  | 0.81   | 0.8    |
| Yu Li          | 2019 | DM  | Others        | CT     | NO | ML | 48  | 19  | 3  | 5  | 21  | 0.7886 | 0.8648 | 0.85   |
| Zhiguo Zhou    | 2019 | LNM | HNC           | PET    | NO | DL | 165 | 34  | 18 | 5  | 108 | 0.87   | 0.86   | 0.94   |
| Zhiguo Zhou    | 2019 | LNM | HNC           | PET    | NO | DL | 165 | 33  | 19 | 6  | 107 | 0.85   | 0.85   | 0.92   |
| Zhiguo Zhou    | 2019 | LNM | HNC           | PET    | NO | DL | 165 | 37  | 10 | 2  | 116 | 0.95   | 0.92   | 0.98   |
| Zhiguo Zhou    | 2019 | LNM | HNC           | CT     | NO | DL | 165 | 34  | 20 | 5  | 106 | 0.87   | 0.84   | 0.95   |
| Zhiguo Zhou    | 2019 | LNM | HNC           | CT     | NO | DL | 165 | 32  | 21 | 7  | 105 | 0.82   | 0.83   | 0.88   |
| Zhiguo Zhou    | 2019 | LNM | HNC           | CT     | NO | DL | 165 | 35  | 13 | 4  | 113 | 0.9    | 0.9    | 0.97   |
| Zhiguo Zhou    | 2019 | LNM | HNC           | PET-CT | NO | DL | 165 | 33  | 14 | 6  | 112 | 0.85   | 0.89   | 0.96   |
| Zhiguo Zhou    | 2019 | LNM | HNC           | PET-CT | NO | DL | 165 | 27  | 6  | 12 | 120 | 0.69   | 0.95   | 0.95   |
| Zhiguo Zhou    | 2019 | LNM | HNC           | PET-CT | NO | DL | 165 | 37  | 9  | 2  | 117 | 0.95   | 0.93   | 0.99   |
| Fang Hou       | 2019 | LNM | NR            | CT     | NO | ML | 259 | 22  | 8  | 3  | 226 | 0.88   | 0.97   |        |
| Jiaxiu Luo     | 2018 | LNM | Breast cancer | MRI    | NO | ML | 172 | 44  | 20 | 30 | 78  | 0.6    | 0.8    | 0.798  |
| Jiaxiu Luo     | 2018 | LNM | Breast cancer | MRI    | NO | ML | 172 | 59  | 16 | 15 | 82  | 0.8    | 0.833  | 0.828  |
| Jiaxiu Luo     | 2018 | LNM | Breast cancer | MRI    | NO | ML | 172 | 44  | 26 | 30 | 72  | 0.6    | 0.733  | 0.767  |
| Jiaxiu Luo     | 2018 | LNM | Breast cancer | MRI    | NO | ML | 172 | 48  | 20 | 26 | 78  | 0.65   | 0.8    | 0.788  |
| Jiaxiu Luo     | 2018 | LNM | Breast cancer | MRI    | NO | ML | 172 | 41  | 26 | 33 | 72  | 0.55   | 0.733  | 0.737  |
| Jiaxiu Luo     | 2018 | LNM | Breast cancer | MRI    | NO | ML | 172 | 44  | 23 | 30 | 75  | 0.6    | 0.767  | 0.777  |
| Jiaxiu Luo     | 2018 | LNM | Breast cancer | MRI    | NO | ML | 172 | 56  | 13 | 18 | 85  | 0.75   | 0.867  | 0.823  |

|                              |      |     |               |        |    |    |     |     |    |    |     |        |        |        |
|------------------------------|------|-----|---------------|--------|----|----|-----|-----|----|----|-----|--------|--------|--------|
| Jiaxiu Luo                   | 2018 | LNM | Breast cancer | MRI    | NO | ML | 172 | 64  | 16 | 10 | 82  | 0.867  | 0.833  | 0.852  |
| B.H. Kann                    | 2018 | LNM | HNC           | CT     | NO | DL | 653 | 319 | 35 | 61 | 238 | 0.84   | 0.87   | 0.91   |
| Jeong Hoon Lee               | 2018 | LNM | HNC           | US     | NO | DL | 63  | 31  | 0  | 2  | 30  | 0.93   | 1      |        |
| Jeong Hoon Lee               | 2018 | LNM | HNC           | US     | NO | DL | 200 | 89  | 23 | 11 | 77  | 0.89   | 0.77   |        |
| José Raniery Ferreira Junior | 2018 | LNM | Others        | CT     | NO | ML | 16  | 6   | 2  | 3  | 5   | 0.67   | 0.71   | 0.75   |
| José Raniery Ferreira Junior | 2018 | DM  | Others        | CT     | NO | ML | 16  | 4   | 6  | 1  | 5   | 0.8    | 0.46   | 0.71   |
| Wang, H                      | 2017 | LNM | Others        | PET-CT | NO | ML | 240 | 92  | 14 | 28 | 106 | 0.7708 | 0.8837 | 0.9148 |
| Wang, H                      | 2017 | LNM | Others        | PET-CT | NO | ML | 240 | 106 | 59 | 14 | 61  | 0.8805 | 0.5042 | 0.7997 |
| Wang, H                      | 2017 | LNM | Others        | PET-CT | NO | ML | 240 | 92  | 14 | 28 | 106 | 0.7708 | 0.8837 | 0.9148 |
| Wang, H                      | 2017 | LNM | Others        | PET-CT | NO | ML | 240 | 93  | 14 | 27 | 106 | 0.7782 | 0.8848 | 0.8997 |
| Wang, H                      | 2017 | LNM | Others        | PET-CT | NO | ML | 240 | 98  | 14 | 22 | 106 | 0.8156 | 0.8859 | 0.9165 |
| Wang, H                      | 2017 | LNM | Others        | PET-CT | NO | ML | 240 | 88  | 21 | 32 | 99  | 0.7335 | 0.8266 | 0.8624 |
| Wang, H                      | 2017 | LNM | Others        | PET-CT | NO | ML | 240 | 102 | 19 | 18 | 101 | 0.8491 | 0.8406 | 0.9137 |
| Wang, H                      | 2017 | LNM | Others        | PET-CT | NO | ML | 240 | 99  | 18 | 21 | 102 | 0.8289 | 0.8512 | 0.9031 |
| Wang, H                      | 2017 | LNM | Others        | PET-CT | NO | ML | 240 | 103 | 19 | 17 | 101 | 0.8565 | 0.8445 | 0.9143 |
| Wang, H                      | 2017 | LNM | Others        | PET-CT | NO | ML | 240 | 85  | 22 | 35 | 98  | 0.7073 | 0.8158 | 0.8466 |
| Wang, H                      | 2017 | LNM | Others        | PET-CT | NO | ML | 240 | 100 | 19 | 20 | 101 | 0.8295 | 0.8456 | 0.9097 |
| Wang, H                      | 2017 | LNM | Others        | PET-CT | NO | ML | 240 | 101 | 16 | 19 | 104 | 0.8408 | 0.8662 | 0.9044 |
| Wang, H                      | 2017 | LNM | Others        | PET-CT | NO | ML | 240 | 91  | 18 | 29 | 102 | 0.7565 | 0.8538 | 0.874  |
| Wang, H                      | 2017 | LNM | Others        | PET-CT | NO | ML | 240 | 64  | 35 | 56 | 85  | 0.5326 | 0.7102 | 0.6581 |
| Wang, H                      | 2017 | LNM | Others        | PET-CT | NO | ML | 240 | 62  | 33 | 58 | 87  | 0.5189 | 0.7287 | 0.6458 |
| Wang, H                      | 2017 | LNM | Others        | PET-CT | NO | ML | 240 | 91  | 29 | 29 | 91  | 0.7562 | 0.7591 | 0.8117 |
| Wang, H                      | 2017 | LNM | Others        | PET-CT | NO | DL | 240 | 100 | 15 | 20 | 105 | 0.8353 | 0.8775 | 0.9086 |

|                   |      |     |               |     |     |    |      |     |     |    |     |        |       |       |
|-------------------|------|-----|---------------|-----|-----|----|------|-----|-----|----|-----|--------|-------|-------|
| Yan Zhong         | 2018 | LNM | Others        | CT  | NO  | ML | 492  | 74  | 33  | 4  | 381 | 0.948  | 0.92  | 0.972 |
| Mitsuru Koizumi   | 2017 | DM  | Others        | BS  | YES | ML | 265  | 102 | 17  | 22 | 84  | 0.82   | 0.83  | 0.888 |
| Tuan D. Pham      | 2017 | LNM | Others        | US  | NO  | ML | 271  | 78  | 23  | 55 | 115 | 0.59   | 0.83  | 0.76  |
| Tuan D. Pham      | 2017 | LNM | Others        | US  | NO  | ML | 271  | 97  | 30  | 36 | 108 | 0.73   | 0.78  | 0.81  |
| Tuan D. Pham      | 2017 | LNM | Others        | US  | NO  | ML | 271  | 73  | 26  | 60 | 112 | 0.55   | 0.81  | 0.72  |
| Tuan D. Pham      | 2017 | LNM | Others        | US  | NO  | ML | 271  | 96  | 47  | 37 | 91  | 0.72   | 0.66  | 0.72  |
| Tuan D. Pham      | 2017 | LNM | Others        | US  | NO  | ML | 271  | 104 | 33  | 29 | 105 | 0.78   | 0.76  | 0.82  |
| Tuan D. Pham      | 2017 | LNM | Others        | US  | NO  | ML | 271  | 102 | 28  | 31 | 110 | 0.77   | 0.8   | 0.85  |
| Tuan D. Pham      | 2017 | LNM | Others        | US  | NO  | ML | 271  | 84  | 7   | 49 | 131 | 0.63   | 0.95  | 0.86  |
| Tuan D. Pham      | 2017 | LNM | Others        | US  | NO  | ML | 271  | 97  | 19  | 36 | 119 | 0.73   | 0.86  | 0.86  |
| Tuan D. Pham      | 2017 | LNM | Others        | US  | NO  | ML | 271  | 100 | 14  | 33 | 124 | 0.75   | 0.9   | 0.89  |
| Qi Zhang          | 2017 | LNM | Breast cancer | US  | NO  | ML | 161  | 79  | 17  | 13 | 52  | 0.859  | 0.754 | 0.875 |
| Qi Zhang          | 2017 | LNM | Breast cancer | US  | NO  | ML | 161  | 63  | 9   | 29 | 60  | 0.685  | 0.87  | 0.794 |
| Qi Zhang          | 2017 | LNM | Breast cancer | US  | NO  | ML | 161  | 78  | 9   | 14 | 60  | 0.848  | 0.87  | 0.895 |
| Qi Zhang          | 2017 | LNM | Breast cancer | US  | NO  | ML | 161  | 66  | 8   | 26 | 61  | 0.717  | 0.884 |       |
| Qi Zhang          | 2017 | LNM | Breast cancer | US  | NO  | ML | 161  | 63  | 11  | 29 | 58  | 0.685  | 0.841 |       |
| Qi Zhang          | 2017 | LNM | Breast cancer | US  | NO  | ML | 161  | 77  | 10  | 15 | 59  | 0.837  | 0.855 |       |
| Yu-wen Wang       | 2016 | LNM | HNC           | MRI | NO  | ML | 410  | 173 | 10  | 38 | 189 | 0.822  | 0.952 |       |
| Aneta Chmielewski | 2015 | LNM | Breast cancer | US  | NO  | ML | 105  | 21  | 8   | 2  | 73  | 0.9    | 0.9   | 0.95  |
| Mitsuru Koizumi   | 2015 | DM  | Others        | BS  | YES | ML | 426  | 128 | 53  | 24 | 221 | 0.841  | 0.807 |       |
| Osamu Tokuda      | 2014 | DM  | Others        | BS  | YES | ML | 568  | 99  | 100 | 5  | 364 | 0.952  | 0.784 |       |
| Osamu Tokuda      | 2014 | DM  | Breast cancer | BS  | YES | ML | 872  | 35  | 267 | 7  | 563 | 0.833  | 0.678 |       |
| Osamu Tokuda      | 2014 | DM  | Others        | BS  | YES | ML | 1224 | 50  | 333 | 6  | 835 | 0.893  | 0.715 |       |
| Osamu Tokuda      | 2014 | DM  | Others        | BS  | YES | ML | 584  | 33  | 199 | 0  | 352 | 1      | 0.639 |       |
| Zhi-Guo Zhou      | 2013 | LNM | Others        | CT  | NO  | ML | 175  | 120 | 8   | 14 | 33  | 0.8951 | 0.8   | 0.829 |

|                 |      |     |                           |     |    |    |      |     |    |    |      |        |        |        |
|-----------------|------|-----|---------------------------|-----|----|----|------|-----|----|----|------|--------|--------|--------|
| Zhi-Guo Zhou    | 2013 | LNM | Others                    | CT  | NO | ML | 175  | 113 | 15 | 21 | 26   | 0.8453 | 0.6429 | 0.791  |
| Zhi-Guo Zhou    | 2013 | LNM | Others                    | CT  | NO | ML | 175  | 117 | 13 | 17 | 28   | 0.8723 | 0.6765 | 0.78   |
| Zhi-Guo Zhou    | 2013 | LNM | Others                    | CT  | NO | ML | 175  | 103 | 16 | 31 | 25   | 0.7657 | 0.6036 | 0.688  |
| Zhi-Guo Zhou    | 2013 | LNM | Others                    | CT  | NO | ML | 175  | 115 | 13 | 19 | 28   | 0.8611 | 0.6774 | 0.781  |
| Zhi-Guo Zhou    | 2013 | LNM | Others                    | CT  | NO | ML | 175  | 116 | 14 | 18 | 27   | 0.8622 | 0.6667 | 0.782  |
| Zhi-Guo Zhou    | 2013 | LNM | Others                    | CT  | NO | ML | 175  | 116 | 16 | 18 | 25   | 0.8633 | 0.6111 | 0.769  |
| Zhi-Guo Zhou    | 2013 | LNM | Others                    | CT  | NO | ML | 175  | 115 | 14 | 19 | 27   | 0.8552 | 0.6667 | 0.793  |
| Seungwook Yang  | 2013 | DM  | NR                        | MRI | NO | ML | 496  | 43  | 8  | 10 | 435  | 0.811  | 0.982  | 0.9355 |
| Seungwook Yang  | 2013 | DM  | NR                        | MRI | NO | ML | 5841 | 16  | 2  | 37 | 5786 | 0.302  | 0.9997 | 0.6508 |
| Xiao-Peng Zhang | 2011 | LNM | Others                    | CT  | NO | ML | 175  | 119 | 9  | 15 | 32   | 0.89   | 0.79   | 0.88   |
| May Sadik       | 2008 | DM  | Breast/prostate<br>cancer | BS  | NO | ML | 59   | 19  | 4  | 2  | 34   | 0.9    | 0.89   |        |
| Junhua Zhang    | 2008 | LNM | NR                        | US  | NO | ML | 210  | 96  | 15 | 18 | 81   | 0.84   | 0.84   |        |
| Rie Tagaya      | 2008 | LNM | Others                    | US  | NO | ML | 82   | 55  | 11 | 5  | 11   | 0.924  | 0.52   |        |
| Rie Tagaya      | 2008 | LNM | Others                    | US  | NO | ML | 82   | 56  | 8  | 4  | 14   | 0.939  | 0.64   |        |
| Rie Tagaya      | 2008 | LNM | Others                    | US  | NO | ML | 82   | 55  | 5  | 5  | 17   | 0.924  | 0.76   |        |
| Rie Tagaya      | 2008 | LNM | Others                    | US  | NO | ML | 82   | 59  | 8  | 1  | 14   | 0.985  | 0.64   |        |
| Rie Tagaya      | 2008 | LNM | Others                    | US  | NO | ML | 82   | 51  | 6  | 9  | 16   | 0.849  | 0.72   |        |
| Rie Tagaya      | 2008 | LNM | Others                    | US  | NO | ML | 82   | 51  | 4  | 9  | 18   | 0.849  | 0.84   |        |
| Rie Tagaya      | 2008 | LNM | Others                    | US  | NO | ML | 82   | 52  | 11 | 8  | 11   | 0.864  | 0.48   |        |
| Rie Tagaya      | 2008 | LNM | Others                    | US  | NO | ML | 82   | 55  | 6  | 5  | 11   | 0.909  | 0.72   |        |
| Rie Tagaya      | 2008 | LNM | Others                    | US  | NO | ML | 82   | 56  | 6  | 4  | 16   | 0.934  | 0.72   |        |
| Rie Tagaya      | 2008 | LNM | Others                    | US  | NO | ML | 82   | 59  | 6  | 1  | 16   | 0.985  | 0.72   |        |
| Ali Aslantas    | 2016 | DM  | Others                    | BS  | NO | ML | 60   | 37  | 3  | 2  | 18   | 0.9487 | 0.8571 |        |
| Ali Aslantas    | 2016 | DM  | Others                    | BS  | NO | ML | 130  | 94  | 6  | 2  | 28   | 0.9792 | 0.8235 |        |

|              |      |     |     |    |    |    |     |    |    |    |     |       |       |  |
|--------------|------|-----|-----|----|----|----|-----|----|----|----|-----|-------|-------|--|
| Yoshiko Arij | 2019 | LNM | HNC | CT | NO | DL | 143 | 24 | 9  | 9  | 101 | 0.714 | 0.914 |  |
| Yoshiko Arij | 2019 | LNM | HNC | CT | NO | DL | 143 | 24 | 15 | 9  | 95  | 0.714 | 0.867 |  |
| Yoshiko Arij | 2019 | LNM | HNC | CT | NO | DL | 143 | 23 | 4  | 10 | 106 | 0.686 | 0.962 |  |
| Yoshiko Arij | 2019 | LNM | HNC | CT | NO | DL | 143 | 20 | 14 | 13 | 96  | 0.6   | 0.876 |  |
| Yoshiko Arij | 2019 | LNM | HNC | CT | NO | DL | 143 | 21 | 15 | 12 | 95  | 0.629 | 0.867 |  |
| Yoshiko Arij | 2019 | LNM | HNC | CT | NO | DL | 143 | 22 | 11 | 11 | 99  | 0.669 | 0.897 |  |

- Abbreviation: NR=not reported. LNM= Lymph node metastasis. DM= distant metastasis. US= ultrasound. CT= computed tomography. MRI= magnetic resonance imaging. BS=bone scintigraphy. HNC= head and neck cancer. DL= Deep learning. ML=Machine learning.
