# Supplementary material for: Artificial intelligence performance in detecting tumor metastasis from medical radiology imaging: A systematic review and meta-analysis
Source: PubMed Central journal article supplement — eClinicalMedicine. 2020 Dec 25;31:100669. doi: 10.1016/j.eclinm.2020.100669 (PMC7773591; doi:10.1016/j.eclinm.2020.100669), 2020-12-25
Supplement: mmc2.pdf [file mmc2.pdf]

**Supplementary figure 1: Risk of bias for each risk of bias item in included studies**

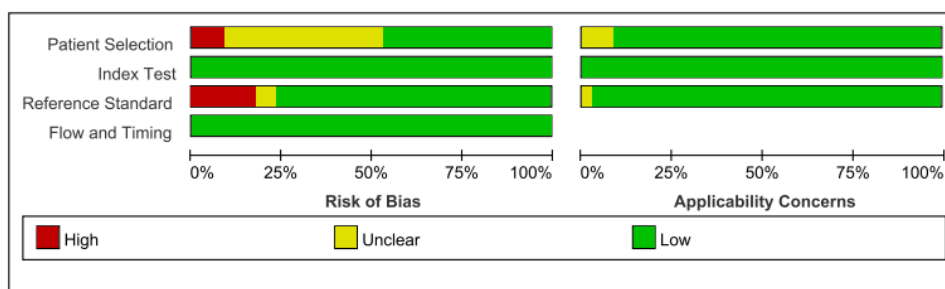

**Supplementary figure 2: Publication bias**

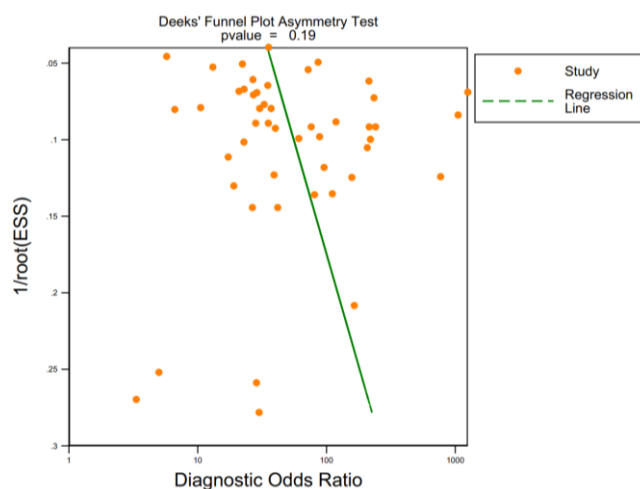

Funnel plots suggested there was no publication bias

**Supplementary table: Meta-regression result**

| Covariates          | Subgroup              | $\tau^2$ | $I^2$  | Adjusted- $R^2$ | F value |
|---------------------|-----------------------|----------|--------|-----------------|---------|
| Metastasis          | Lymph node metastasis | 81.8     | 33.99% | -13.27%         | -       |
|                     | Distant metastasis    |          |        |                 |         |
| Tumor type          | Head and neck tumor   | 80.6     | 30.57% | -11.62%         | 0.65    |
|                     | Breast tumor          |          |        |                 |         |
|                     | Others                |          |        |                 |         |
| Image type          | Bone scintigraphy     | 31.32    | 0.00%  | 56.63%          | 2.35    |
|                     | CT                    |          |        |                 |         |
|                     | MRI                   |          |        |                 |         |
|                     | Ultrasound            |          |        |                 |         |
| External validation | Yes                   | 81.05    | 32.78% | -12.24%         | -       |
|                     | No                    |          |        |                 |         |
| Algorithm           | Deep learning         | 79.26    | 35.17% | -9.76%          | -       |
|                     | Machine Learning      |          |        |                 |         |
